# Supplementary material for: Complete mucosal healing of distal lesions induced by twice-daily budesonide 2-mg foam promoted clinical remission of mild-to-moderate ulcerative colitis with distal active inflammation: double-blind, randomized study
Source: Springer Nature journal article supplement (doi:10.1007/s00535-017-1376-4), 2017-08-04
Supplement: MOESM1 [file 13349704]

## Supplementary materials

(a)

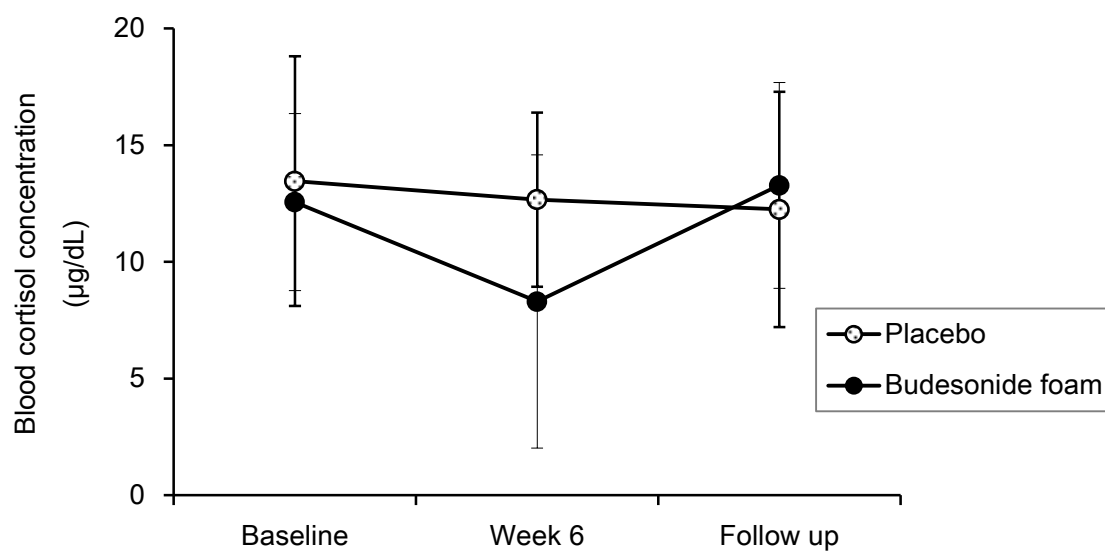

(b)

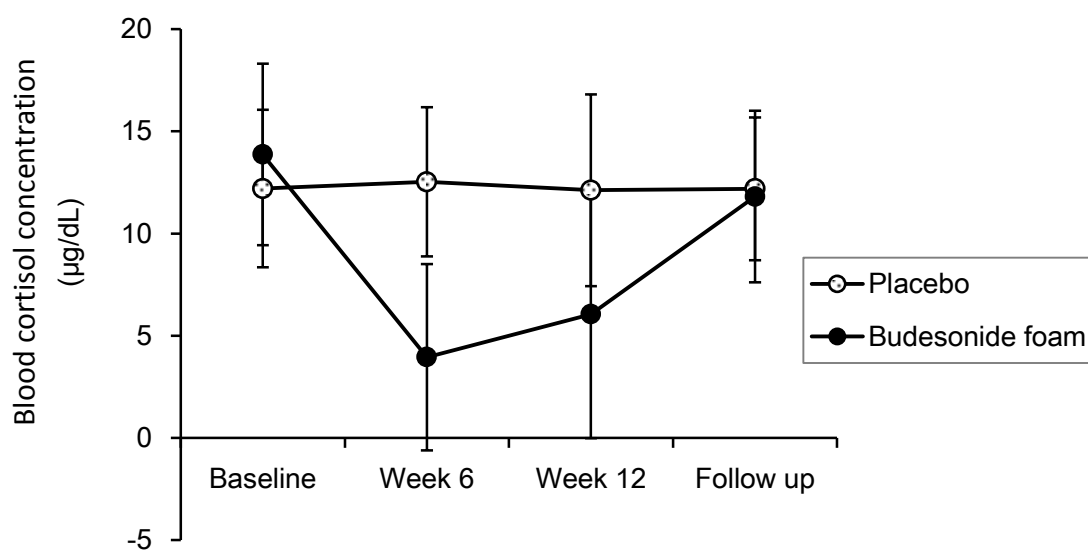

**Figure S1. Mean morning plasma cortisol concentrations**

(a) 6-week treatment, (b) 12-week treatment.

Data presented are mean and standard deviation.

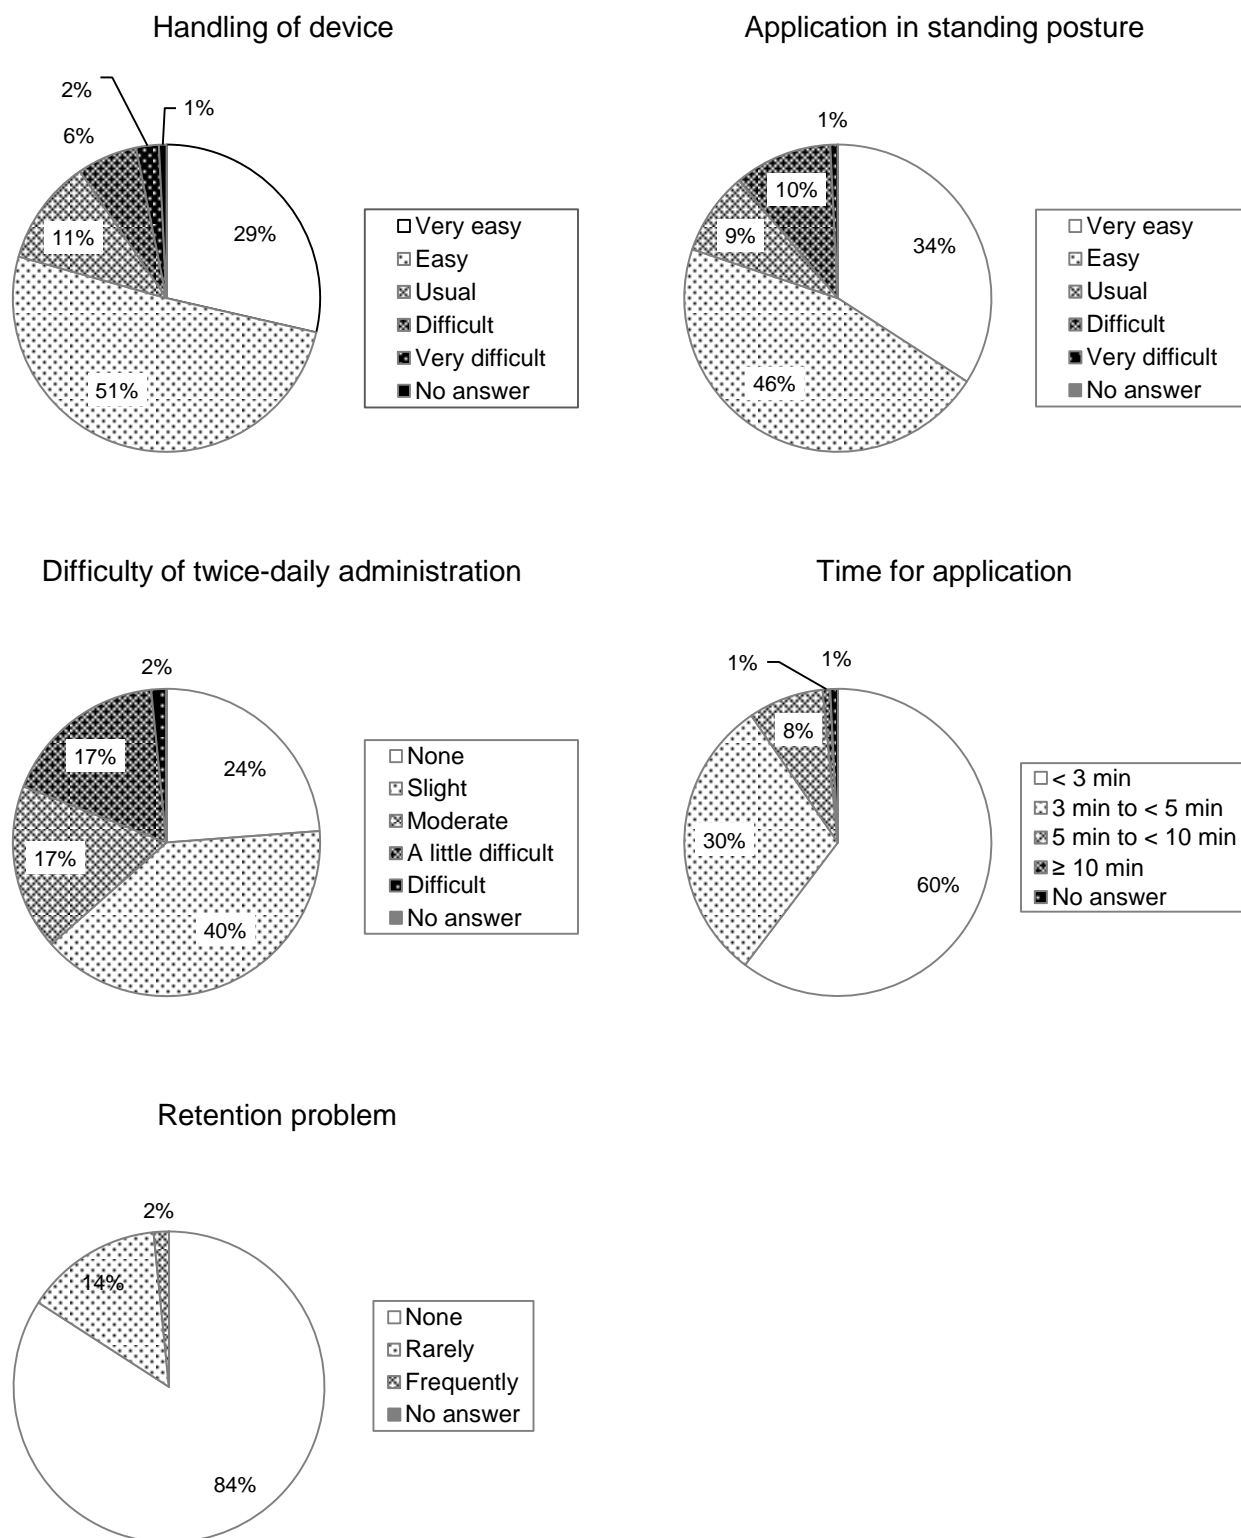

**Figure S2. Patients' acceptance**

All 126 patients were asked to complete questionnaires on general problems regarding the treatment at week 6 or at withdrawal visit.

**Table S1. Other efficacy endpoints**

|                                      | Placebo<br>(N = 62) | Budesonide foam<br>(N = 64) | Odds ratio | P value <sup>a</sup> |
|--------------------------------------|---------------------|-----------------------------|------------|----------------------|
| Endoscopic subscore $\leq 1$ , n (%) | 22 (35.5)           | 48 (75.0)                   | 5.716      | < 0.0001             |
| MMDAI <sup>b</sup> $\leq 1$ , n (%)  | 3 (4.8)             | 22 (34.4)                   | 12.406     | 0.0002               |
| Rectal bleeding subscore of 0, n (%) |                     |                             |            |                      |
| Week 2                               | 15 (23.7)           | 34 (53.1)                   | 3.801      | 0.0015               |
| Week 4                               | 19 (32.2)           | 40 (65.6)                   | 4.510      | 0.0003               |
| Week 6                               | 24 (42.9)           | 41 (68.3)                   | 3.090      | 0.0053               |

<sup>a</sup>Statistical analyses were performed at the level of significance of 0.05 (two-sided).

<sup>b</sup>MMDAI, Modified Mayo Disease Activity Index;
